# Supplementary material for: The Efficacy and Safety of Brolucizumab for the Treatment of nAMD: A Systematic Review and Meta-Analysis
Source: PubMed Central journal article supplement (PMC9136056; doi:10.3389/fphar.2022.890732), 2022-05-13
Supplement: DataSheet1.pdf [file DataSheet1.pdf]

## **Supplementary Figure Captions**

Supplementary Figure S1 The funnel plot of BCVA change meta-analysis

Supplementary Figure S2 Forest plots of the adverse events after removing the extended experiment (Novartis Pharmaceuticals 2020)
